# Supplementary material for: Using a quantum dot bead-based lateral flow immunoassay to broadly detect the adulteration of PDE-5 inhibitors in functional foods
Source: Royal Society of Chemistry journal article supplement (doi:10.1039/d2ay00580h), 2022-01-01
Supplement: d2ay00580h1.pdf [file d2ay00580h1.pdf]

1 **Supplementary material for**

2 **Quantum dot beads-based lateral flow immunoassay to broadly detect PDE-5**

3 **inhibitors adulterated in functional food**

4

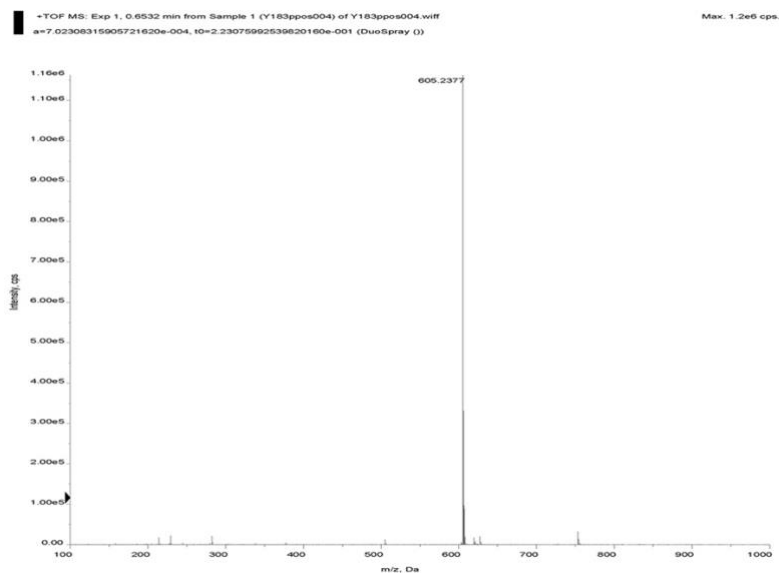

5

6 **Figure S1.** TOF-MS of the hapten.

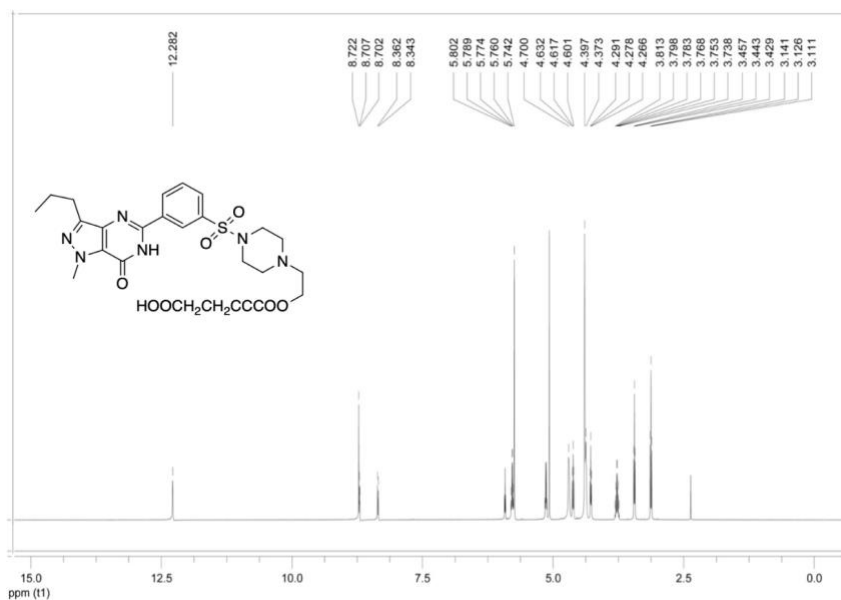

7

8 **Figure S2.** <sup>1</sup>H NMR of the hapten.

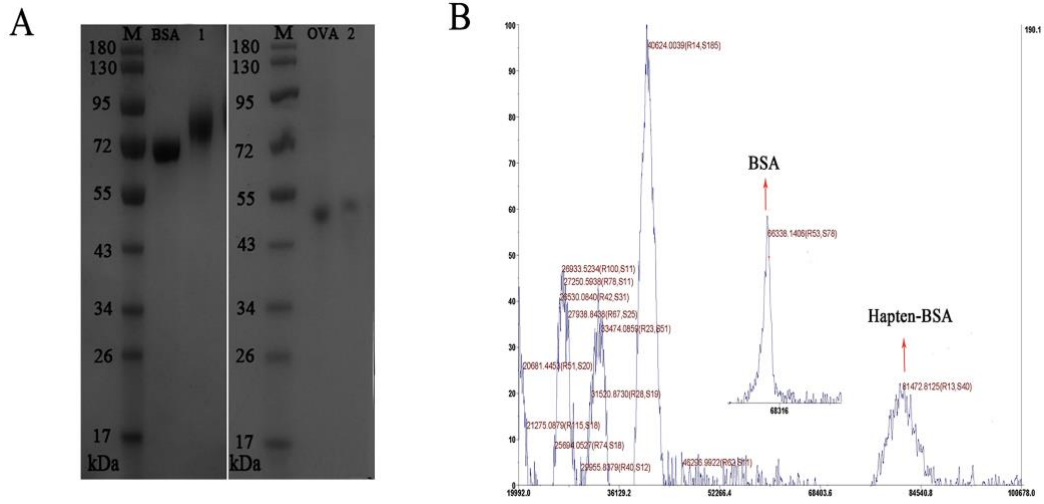

9  
 10 **Figure S3.** (A): SDS-PAGE of antigen. (M: Protein marker (100  $\mu\text{g}/\text{mL}$ ); 1: Hapten-BSA (100  $\mu\text{g}/\text{mL}$ ); 2: Hapten-OVA (50  
 11  $\mu\text{g}/\text{mL}$ ). (B): The MALDI-TOF/MS of hapten-BSA.

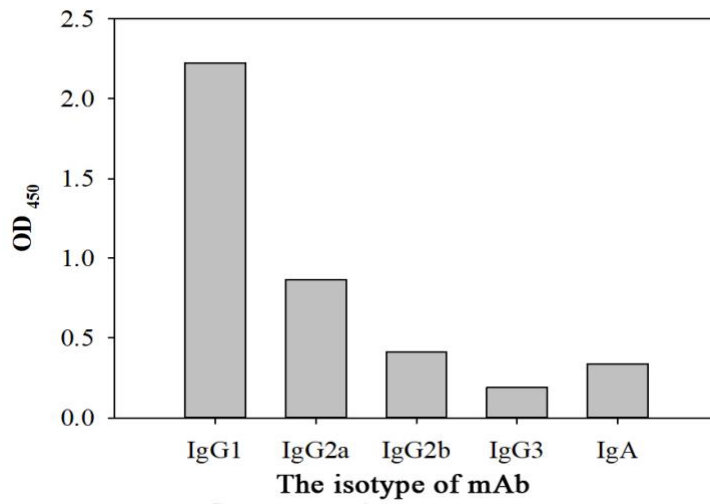

12  
 13 **Figure S4.** The isotype determination of mAb (diluted by 10000 times).

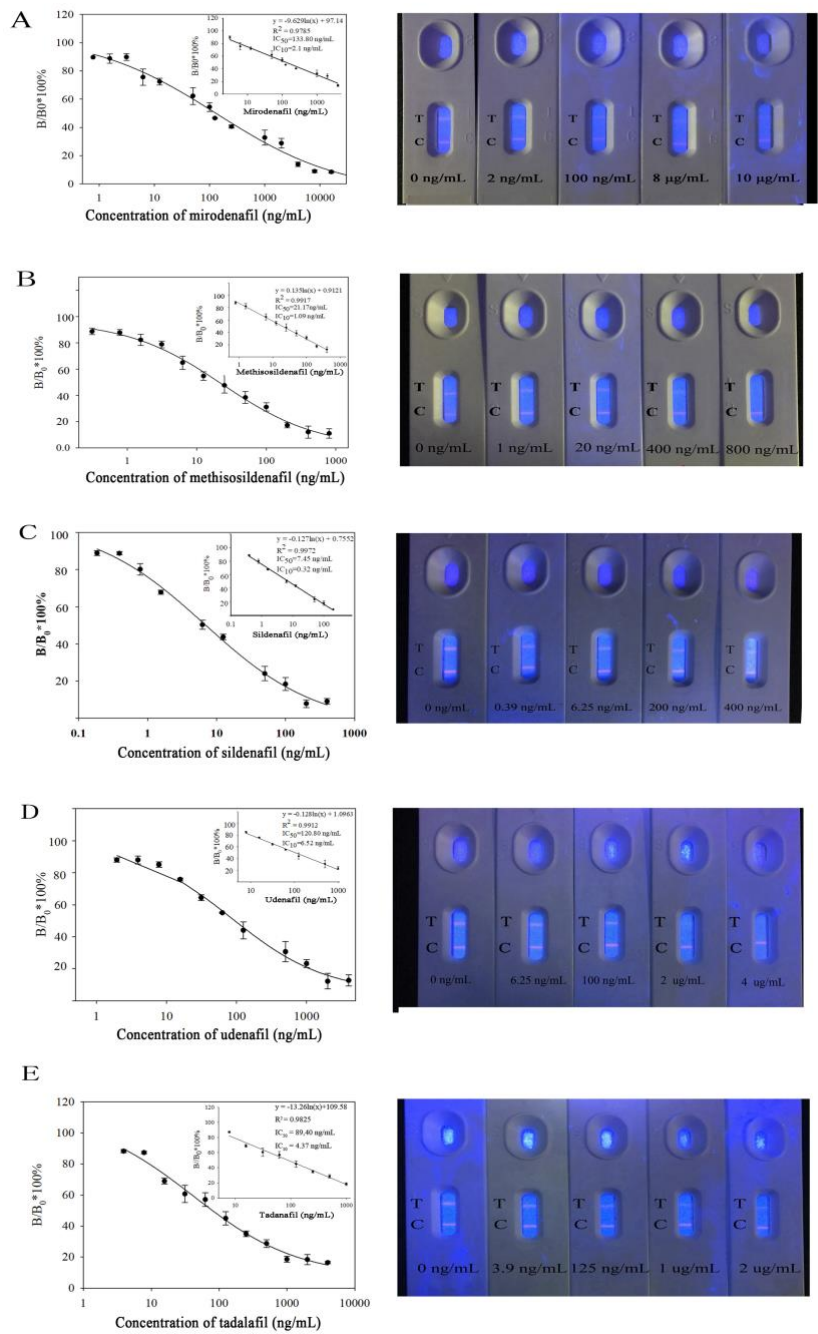

14

15 **Figure S5.** The detection results of PDE-5 inhibitors using QBs-LFIA.

16

**Table S1.** Cross-reaction of mAb for PDE-5 inhibitors using ic-ELISA.

| Compounds          | Structure                                                                           | IC <sub>50</sub><br>(ng/mL) | IC <sub>10</sub><br>(ng/mL) | CR<br>(%) | Linear range<br>(ng/mL) |
|--------------------|-------------------------------------------------------------------------------------|-----------------------------|-----------------------------|-----------|-------------------------|
| Lodenafil          | 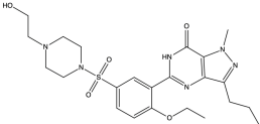   | 12.75                       | 1.30                        | 100       | 1.33-71.67              |
| Methiso-sildenafil |    | 13.30                       | 1.16                        | 95.81     | 2.18-81.50              |
| Sildenafil         |    | 7.79                        | 1.01                        | 163.67    | 1.56-36.33              |
| Mirodenafil        |   | 96                          | 9.34                        | 13.33     | 16.64-560               |
| Udenafil           |  | 153                         | 18.13                       | 6.24      | 31.25-745               |
| Tadalafil          |  | 278                         | 26.91                       | 8.35      | 48.36-1605              |

19 **Table S2.** Comparison of the immunoassay reported for the determination of PDE-5 inhibitors.

| Hapten     | Type of antibody | Identified ability | IC <sub>50</sub> | LOD        | Linear range    | Analytical methods | Reference    |
|------------|------------------|--------------------|------------------|------------|-----------------|--------------------|--------------|
| Sildenafil | polyclonal       | Sildenafil         | 6 ng/mL          | 0.6 ng/mL  | 0.6~100 ng/mL   | ELISA              | [32]         |
|            |                  | Vardenafil         | 60 ng/mL         | —          | —               |                    |              |
|            |                  | Tadalafil          | 250 ng/mL        | —          | —               |                    |              |
| Tadalafil  | polyclonal       | Tadalafil          | 10.04 ng/mL      | —          | —               | AuNPs-ICs          | [33]         |
|            |                  | Amino tadalafil    | 9.55 ng/mL       |            |                 |                    |              |
|            |                  | Acetaminotadalafil | 11.46 ng/mL      |            |                 |                    |              |
|            |                  | Nor-tadalafil      | 17.01 ng/mL      |            |                 |                    |              |
| Vardenafil | monoclonal       | Vardenafil         | 18.2 ng/mL       | 5.0 ng/mL  | 5.0~40 ng/mL    | ic-ELISA           | [35]         |
| Sildenafil | monoclonal       | Sildenafil         | 20.0 µg/kg       | 0.5 µg/kg  | 1.4~13.11 µg/kg | ICA                | [36]         |
|            |                  | Lodenafil          | 12.75 ng/mL      | 1.30 ng/mL |                 |                    |              |
|            |                  | Methiso-sildenafil | 13.30 ng/mL      | 1.16 ng/mL |                 |                    |              |
|            |                  | Sildenafil         | 7.79 ng/mL       | 1.01 ng/mL | Table S1        | QBs-LFIA           | this article |
|            |                  | Mironafil          | 96.49 ng/mL      | 9.34 ng/mL |                 |                    |              |
|            |                  | Udenafil           | 153.16 ng/mL     | 18.13ng/mL |                 |                    |              |
|            |                  | Tadalafil          | 278.71 ng/mL     | 26.91ng/mL |                 |                    |              |

20

21 **Table S3.** Matrix interference of capsules and tablets.

| Samples | Concentration        |            |             |             |             |              |
|---------|----------------------|------------|-------------|-------------|-------------|--------------|
|         | of lodenafil (ng/mL) | PBS Buffer | no dilution | 2× dilution | 5× dilution | 10× dilution |
| Tablet  | 0                    | —          | —           | —           | —           | —            |
|         | 10                   | ±          | ±           | ±           | ±           | ±            |
|         | 100                  | +          | +           | +           | +           | +            |
| Capsule | 0                    | —          | —           | —           | —           | —            |
|         | 10                   | ±          | ±           | ±           | ±           | ±            |
|         | 100                  | +          | +           | +           | +           | +            |

22 <sup>a</sup> —: negative; +,±: positive

23
